# Supplementary material for: Bilingualism and cognition: The impact of age of acquisition, language use and proficiency in healthy older adults
Source: Research Square preprint supplement (doi:10.21203/rs.3.rs-7796112/v1), 2025-11-14
Supplement: Supplementary file 1 [file 912f35072252e250bc232dd3.docx]

**Additional File**

**Table S1.** Descriptive statistics for sociodemographic variables, language and cognitive profile.

| **Variable** |  |  |  |
| --- | --- | --- | --- |
| **Sociodemographic** | **Mean** | **SD** | **Range** |
| Age | 55.78 | 6.66 | 44.00 - 74.00 |
| Years of Education | 13.35 | 3.50 | 4.00 - 18.00 |
| CRQ Total Score | 16.23 | 3.66 | 4.00 - 25.00 |
| CRQ Education Item | 4.31 | 0.72 | 2.00 - 5.00 |
| CRQ Language Item | 1.77 | 0.84 | 0.00 - 3.00 |
| CRQ Total Score adjusted | 10.16 | 2.78 | 1.00 - 17.00 |
|  | **Category** | **Frequency** | **Percentage (%)** |
| Sex | Men | 939 | 37.53% |
| Women | 1563 | 62.47% |
| **Cognitive Measures** | **Mean** | **SD** | **Range** |
| MMSE | 29.02 | 1.08 | 26.00 - 30.00 |
| Semantic Fluency | 22.55 | 5.10 | 12.00 - 44.00 |
| MBT Total free recall | 16.50 | 5.00 | 1.00 - 32.00 |
| MBT Total paired recall | 24.05 | 4.41 | 5.00 - 32.00 |
| MBT Total delayed free recall | 9.07 | 3.37 | 0.00 - 16.00 |
| MBT Total delayed paired recall | 16.86 | 5.16 | 0.00 - 32.00 |
| WAIS-IV Coding | 66.13 | 14.61 | 21.00 - 114.00 |
| WAIS-IV Visual Puzzles | 13.38 | 4.25 | 6.00 - 26.00 |
| WAIS-IV Matrix Reasoning | 16.63 | 4.33 | 5.00 - 26.00 |
| WAIS-IV Digit Span | 24.81 | 5.19 | 11.00 - 46.00 |
| Digits (Forward Span) | 5.77 | 1.23 | 3.00 - 9.00 |
| Digits (Backward Span) | 4.54 | 1.23 | 2.00 - 8.00 |
| Digits (Sequencing Span) | 5.75 | 1.28 | 2.00 - 9.00 |
| **Language Profile** | **Mean** | **SD** | **Range** |
| **Catalan** |  |  |  |
| Catalan Age of Acquisition | 7.85 | 11.14 | 1.00 - 63.00 |
| Catalan Speaking | 4.90 | 0.35 | 1.00 - 5.00 |
| Catalan Comprehension | 4.34 | 1.12 | 1.00 - 5.00 |
| Catalan Writing | 4.83 | 0.53 | 1.00 - 5.00 |
| Catalan Reading | 4.92 | 0.31 | 2.00 - 5.00 |
| **Spanish** |  |  |  |
| Spanish Age of Acquisition | 2.47 | 2.53 | 1.00 - 21.00 |
| Spanish Speaking | 4.93 | 0.28 | 2.00 - 5.00 |
| Spanish Comprehension | 4.96 | 0.21 | 3.00 - 5.00 |
| Spanish Writing | 4.96 | 0.21 | 3.00 - 5.00 |
| Spanish Reading | 4.61 | 0.71 | 1.00 - 5.00 |
|  | **Category** | **Frequency** | **Percentage (%)** |
| Do you speak any other language other than Spanish and Catalan? | No | 849 | 33.52% |
| Yes | 1684 | 66.48% |
| If yes, how many other languages do you know apart from Spanish and Catalan? | 1 | 794 | 47.15% |
| 2 | 663 | 39.37% |
|  | 3 | 165 | 9.80% |
|  | 4 | 43 | 2.55% |
|  | 5 | 19 | 1.13% |

*Note: MMSE: Mini-Mental State Examination; CRQ: Cognitive Reserve Questionnaire; MBT: Memory Binding Test; WAIS: Wechsler Adult Intelligence Scale.*

**Table S2. Language use Questionnaire**

| **Childhood** |  |  |  |  |
| --- | --- | --- | --- | --- |
| 1- Language usually spoken with the mother | Spanish | Catalan | No Preference | Other |
| 2- Language usually spoken with the father | Spanish | Catalan | No Preference | Other |
| 3- Language spoken with other family members at home (siblings, grandparents) | Spanish | Catalan | No Preference | Other |
| 4- Language spoken with others (other relatives, friends, neighbors) | Spanish | Catalan | No Preference | Other |
| 5- Language in which classes were usually taught in school | Spanish | Catalan | No Preference | Other |
| 6- Language usually spoken during play with classmates (e.g., in the playground) | Spanish | Catalan | No Preference | Other |
| **Adulthood** |  |  |  |  |
| 7- Language usually spoken at home (partner, children...) | Spanish | Catalan | No Preference | Other |
| 8- Language usually spoken with other relatives | Spanish | Catalan | No Preference | Other |
| 9- Language usually spoken at work | Spanish | Catalan | No Preference | Other |
| 10- Language usually spoken with friends, neighbors... | Spanish | Catalan | No Preference | Other |
| 11- Language usually spoken in other situations (stores, bank) | Spanish | Catalan | No Preference | Other |
| **Personal** |  |  |  |  |
| 12- Personal language use to speak to oneself | Spanish | Catalan | No Preference | Other |
| 13- Personal language use for counting (e.g., counting objects or doing calculations) | Spanish | Catalan | No Preference | Other |
| 14- Personal language use for swearing, insults... | Spanish | Catalan | No Preference | Other |

**Table S3.** Language Use Questionnaire answers in percentages (%)

| **Group** | **Early High-Proficiency** | | | **Late High-Proficiency** | | | **Late Low-Proficiency** | | |
| --- | --- | --- | --- | --- | --- | --- | --- | --- | --- |
| **Language Use Preference** | Catalan | Bilingual | Spanish | Catalan | Bilingual | Spanish | Catalan | Bilingual | Spanish |
| **Childhood** | | | | | | | | | |
| Language usually spoken with the mother | 87 | 1 | 12 | 1 | 0 | 99 | 0 | 1 | 99 |
| Language usually spoken with the father | 87 | 2 | 11 | 2 | 1 | 97 | 0 | 1 | 99 |
| Language spoken with other family members at home (siblings, grandparents) | 79 | 12 | 9 | 1 | 4 | 95 | 1 | 1 | 98 |
| Language spoken with others (other relatives, friends or neighbors) | 65 | 30 | 5 | 4 | 17 | 79 | 2 | 5 | 93 |
| Language in which classes were usually taught in school | 9 | 9 | 82 | 1 | 3 | 96 | 1 | 2 | 97 |
| Language usually spoken during play with classmates (e.g., in the playground) | 54 | 29 | 17 | 2 | 7 | 91 | 1 | 2 | 97 |
| **Adulthood** | | | | | | | | | |
| Language usually spoken at home (partner, children...) | 82 | 12 | 6 | 31 | 22 | 47 | 8 | 11 | 81 |
| Language usually spoken with other relatives | 75 | 21 | 4 | 10 | 38 | 52 | 4 | 17 | 79 |
| Language usually spoken at work | 55 | 42 | 3 | 45 | 45 | 10 | 12 | 40 | 48 |
| Language usually spoken with friends, neighbors... | 57 | 42 | 1 | 23 | 63 | 14 | 6 | 34 | 60 |
| Language usually spoken in other situations (stores, bank) | 66 | 33 | 1 | 42 | 47 | 11 | 13 | 35 | 52 |
| **Personal** | | | | | | | | | |
| Personal language use to speak to oneself | 86 | 8 | 6 | 16 | 23 | 61 | 3 | 4 | 93 |
| Personal language use for counting (e.g., counting objects or doing calculations) | 74 | 11 | 15 | 14 | 14 | 72 | 2 | 4 | 94 |
| Personal language use for swearing or insults. | 78 | 13 | 9 | 12 | 23 | 65 | 3 | 10 | 87 |
